# Supplementary material
Source: publisher figshare collection journal article supplement (https://karger.figshare.com/articles/dataset/_/5125309)
Supplement: Supplementary file 1 [file 1]

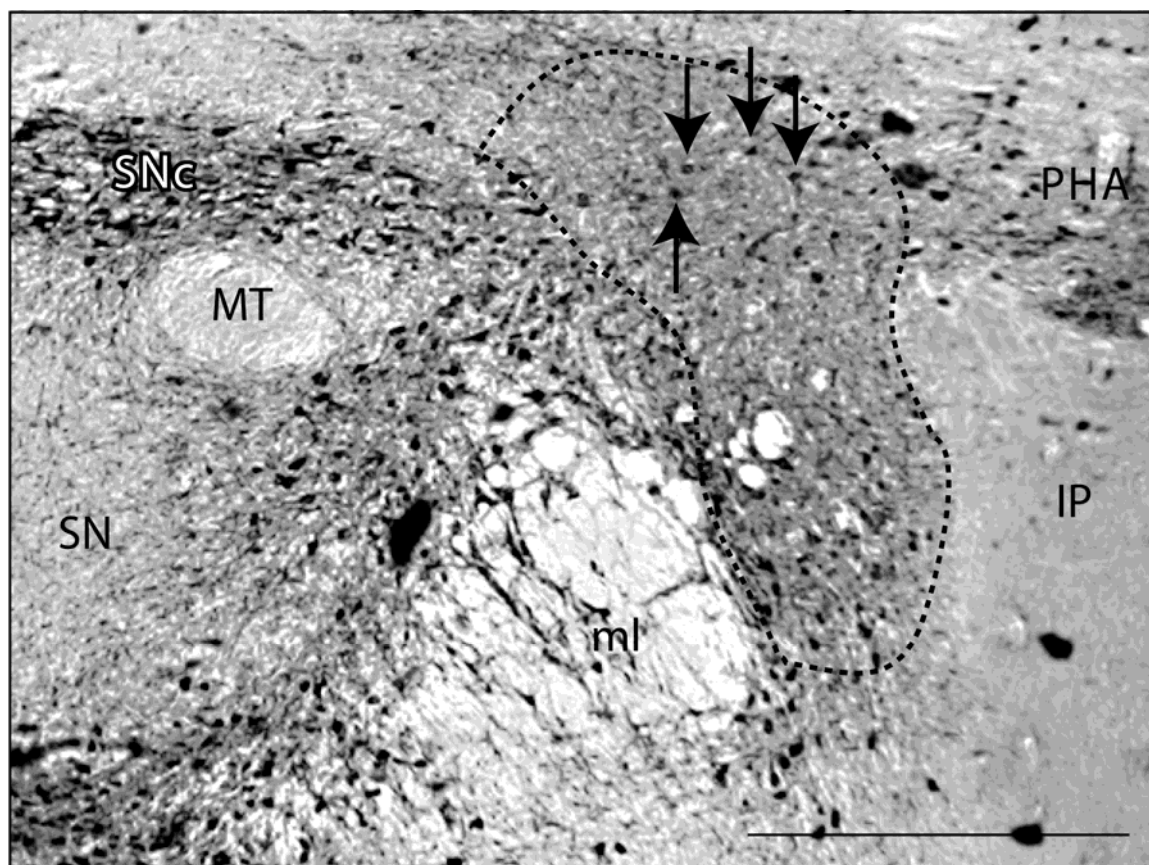

Supplementary Figure 1.

Supplementary Figure 1. Representative photomicrograph of a horizontal section through the middle of the VTA. Arrows point to TH-ir cells. Scale Bar = 500  $\mu\text{m}$ .
